# Supplementary material
Source: PubMed Central journal article supplement (PMC7527944)

---

## Supplemental Online Content

Li C, Li Z, Cao Y, et al. Tofacitinib for the treatment of nail lesions and palmoplantar pustulosis in synovitis, acne, pustulosis, hyperostosis, and osteitis syndrome. *JAMA Dermatol*. Published online September 30, 2020. doi:10.1001/jamadermatol.2020.3095

**eFigure 1.** Change from Baseline in BASDAI in Patients with SAPHO Syndrome Treated with Tofacitinib.

**eFigure 2.** Clinical Response of Nail Involvement, Palmoplantar Pustulosis, Osteoarticular Manifestations, and Inflammatory Parameters in Patients with SAPHO Syndrome Treated with Tofacitinib.

**eFigure 3.** Nail and Skin Lesions in Patients with SAPHO Syndrome Before (Left Column) and After (Right Column) Tofacitinib Treatment: Case 1.

**eFigure 4.** Nail and Skin Lesions in Patients with SAPHO Syndrome Before (Left Column) and After (Right Column) Tofacitinib Treatment: Case 2.

**eFigure 5.** Nail and Skin Lesions in Patients with SAPHO Syndrome Before (Left Column) and After (Right Column) Tofacitinib Treatment: Case 3.

**eFigure 6.** Nail and Skin Lesions in Patients with SAPHO Syndrome Before (Left Column) and After (Right Column) Tofacitinib Treatment: Case 4.

**eFigure 7.** Nail and Skin Lesions in Patients with SAPHO Syndrome Before (Left Column) and After (Right Column) Tofacitinib Treatment: Case 5.

**eFigure 8.** Nail and Skin Lesions in Patients with SAPHO Syndrome Before (Left Column) and After (Right Column) Tofacitinib Treatment: Case 6.

**eFigure 9.** Nail and Skin Lesions in Patients with SAPHO Syndrome Before (Left Column) and After (Right Column) Tofacitinib Treatment: Case 7.

**eFigure 10.** Nail and Skin Lesions in Patients with SAPHO Syndrome Before (Left Column) and After (Right Column) Tofacitinib Treatment: Case 8.

**eFigure 11.** Nail and Skin Lesions in Patients with SAPHO Syndrome Before (Left Column) and After (Right Column) Tofacitinib Treatment: Case 9.

**eFigure 12.** Nail and Skin Lesions in Patients with SAPHO Syndrome Before (Left Column) and After (Right Column) Tofacitinib Treatment: Case 10.

**eFigure 13.** Nail and Skin Lesions in Patients with SAPHO Syndrome Before (Left Column) and After (Right Column) Tofacitinib Treatment: Case 11.

**eFigure 14.** Nail and Skin Lesions in Patients with SAPHO Syndrome Before (Left Column) and After (Right Column) Tofacitinib Treatment: Case 12.

**eFigure 15.** Nail and Skin Lesions in Patients with SAPHO Syndrome Before (Left Column) and After (Right Column) Tofacitinib Treatment: Case 13.

This supplemental material has been provided by the authors to give readers additional information about their work.

**eFigure 1.** Change from Baseline in BASDAI in Patients with SAPHO Syndrome Treated with Tofacitinib.

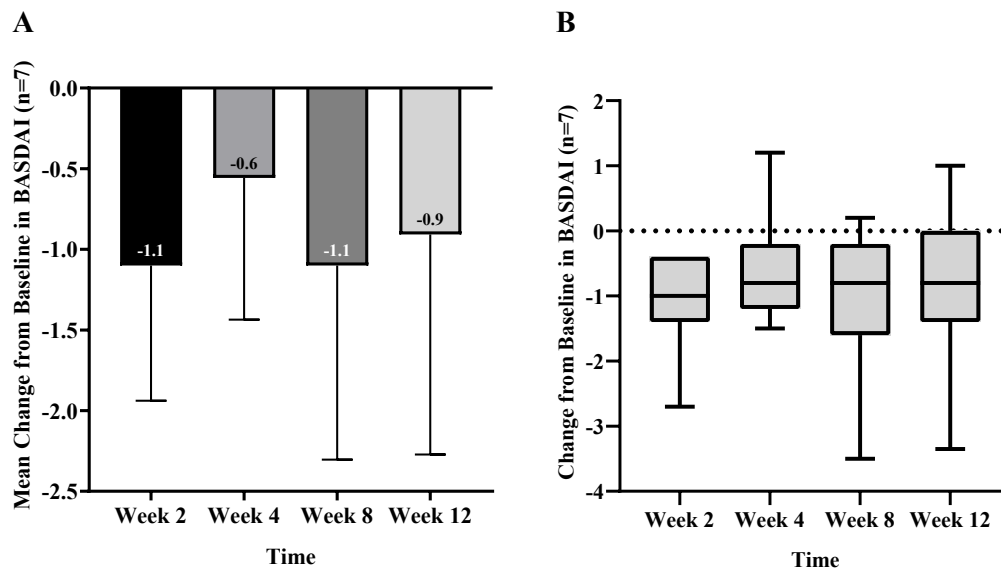

(A) Results of parametric analyses. Data are expressed as the means, with T bars indicating the standard deviation. (B) Results of non-parametric analyses. Boxes include the median and interquartile range. Whiskers are within the 1.5 interquartile range, and circles are outliers. *P* values relate to comparisons between the data obtained at each follow-up and baseline ( $n=7$ , only for patients with spinal or sacroiliac joint involvement). BASDAI, Bath Ankylosing Spondylitis Disease Activity Index.

**eFigure 2.** Clinical Response of Nail Involvement, Palmoplantar Pustulosis, Osteoarticular Manifestations, and Inflammatory Parameters in Patients with SAPHO Syndrome Treated with Tofacitinib.

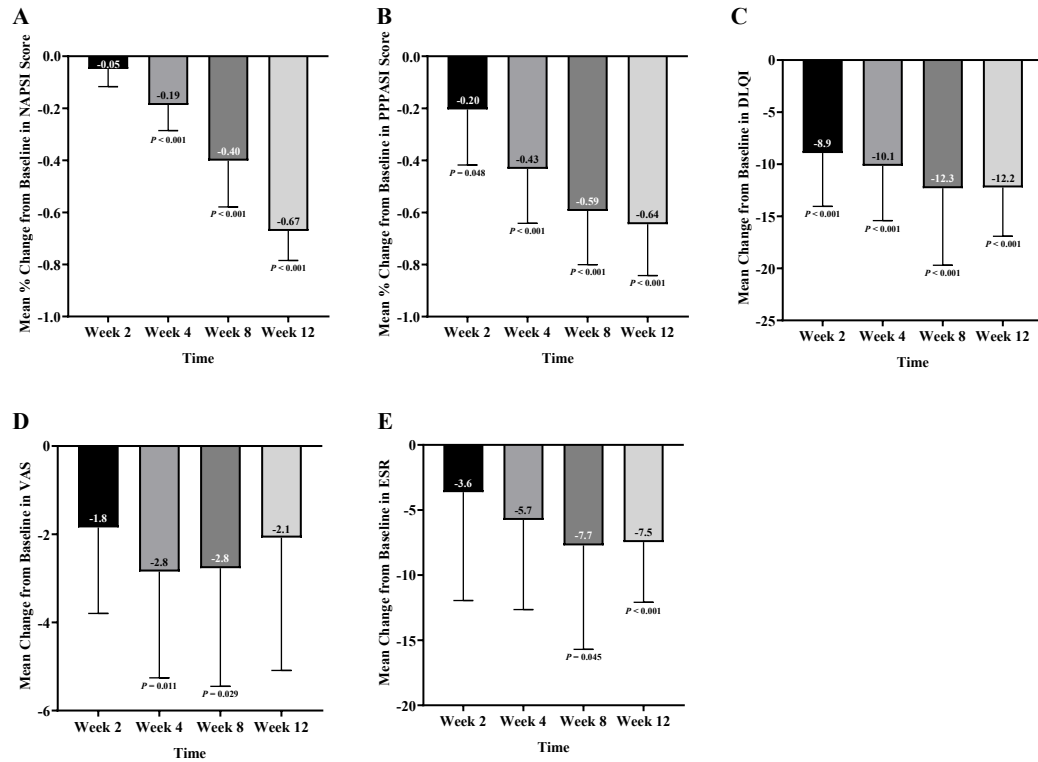

(A) Percent change from baseline in NAPSII during the 12-week treatment period. (B) Percent change from baseline in PPPASI during the 12-week treatment period. (C) DLQI, measured as change from baseline. (D) Change from baseline in VAS in global osteoarticular pain during the 12-week treatment period. (E) Change from baseline in ESR during the 12-week treatment period. Data are expressed as the means, with T bars indicating the standard deviation. *P* values relate to comparisons between the data obtained at each follow-up and baseline using analysis of covariance (ANCOVA). NAPSII, Nail Psoriasis Severity Index; PPPASI, Palmoplantar Psoriasis Area and Severity Index; DLQI, Dermatology Life Quality Index; VAS, Visual Analogue Scale; ESR, erythrocyte sedimentation rate.

**eFigure 3.** Nail and Skin Lesions in Patients with SAPHO Syndrome Before (Left Column) and After (Right Column) Tofacitinib Treatment: Case 1.

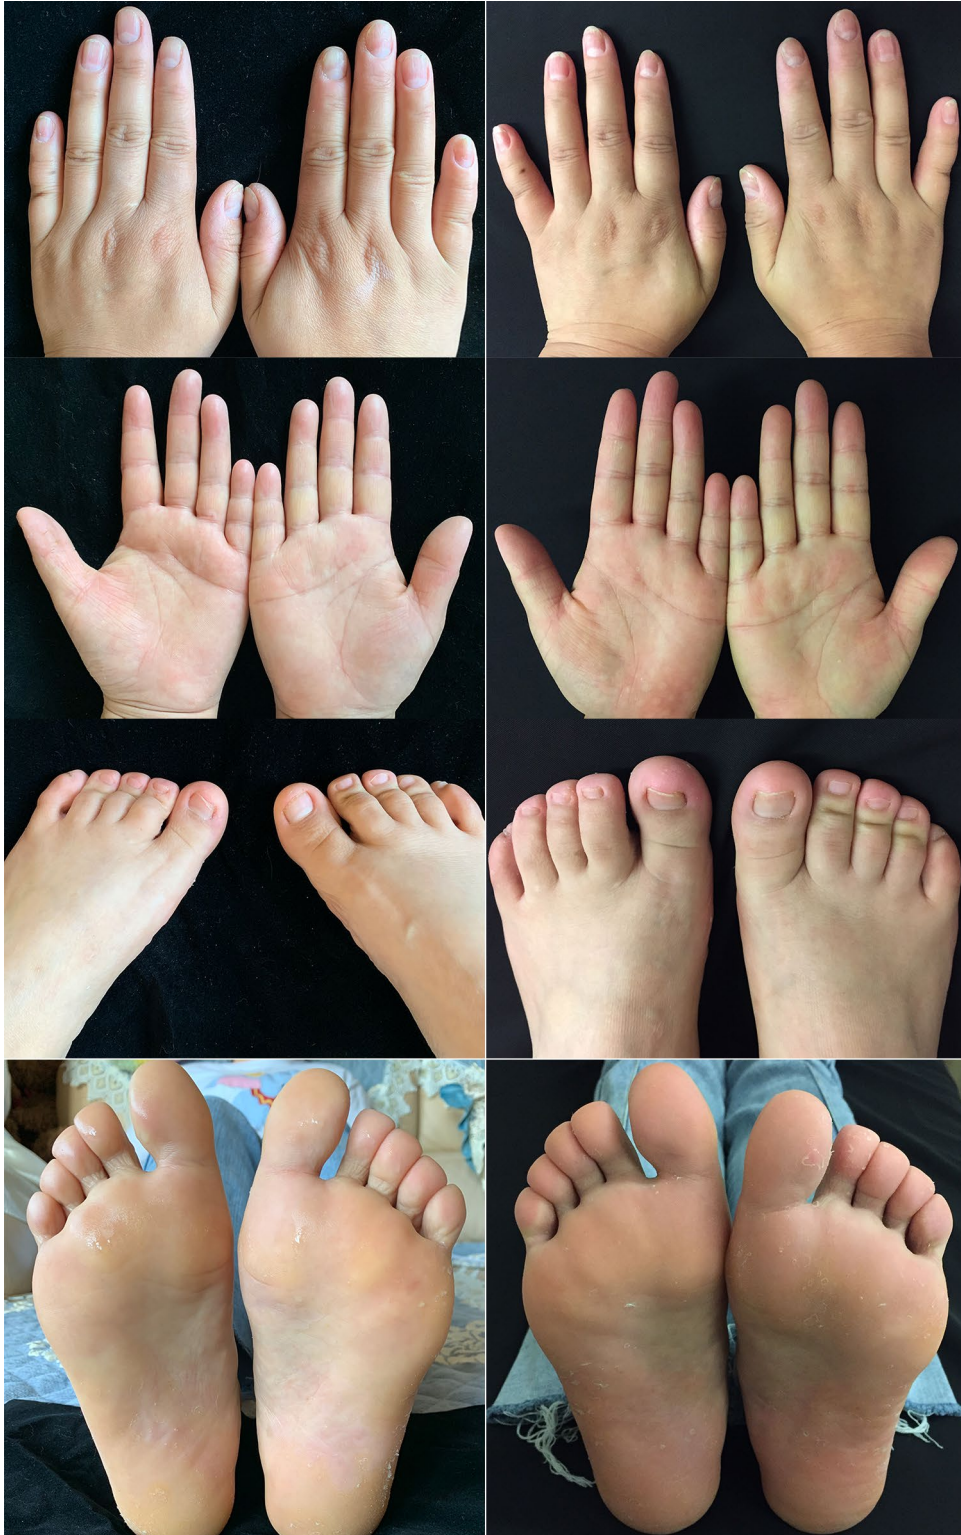



**eFigure 4.** Nail and Skin Lesions in Patients with SAPHO Syndrome Before (Left Column) and After (Right Column) Tofacitinib Treatment: Case 2.

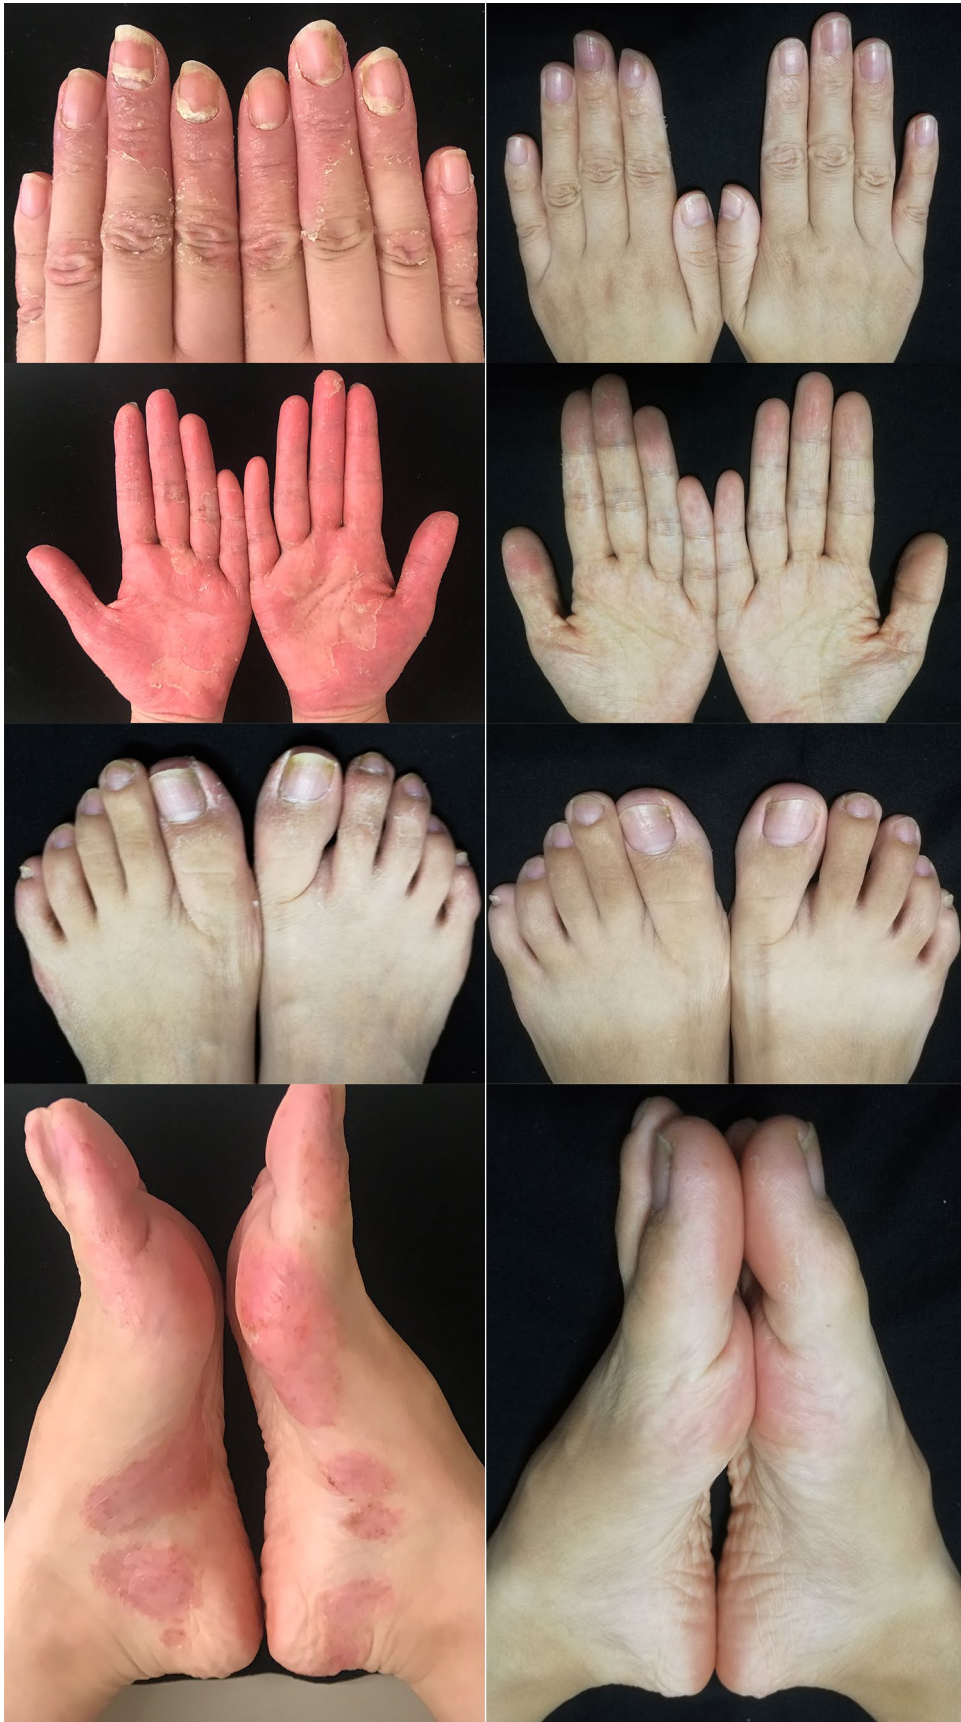

**eFigure 5.** Nail and Skin Lesions in Patients with SAPHO Syndrome Before (Left Column) and After (Right Column) Tofacitinib Treatment: Case 3.

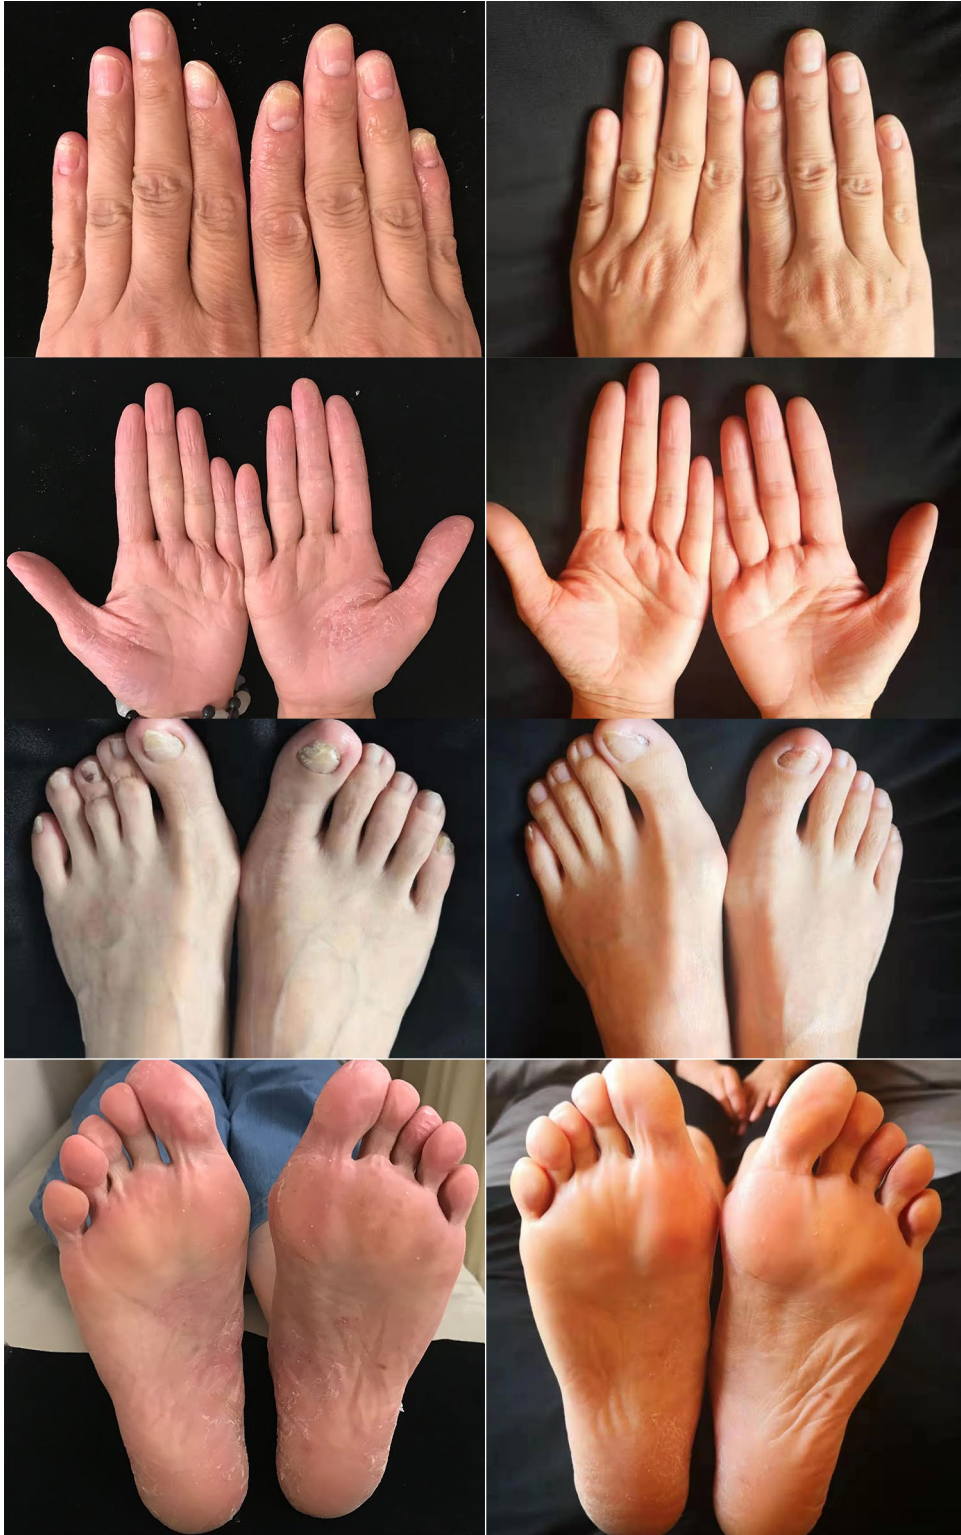



**eFigure 6.** Nail and Skin Lesions in Patients with SAPHO Syndrome Before (Left Column) and After (Right Column) Tofacitinib Treatment: Case 4.

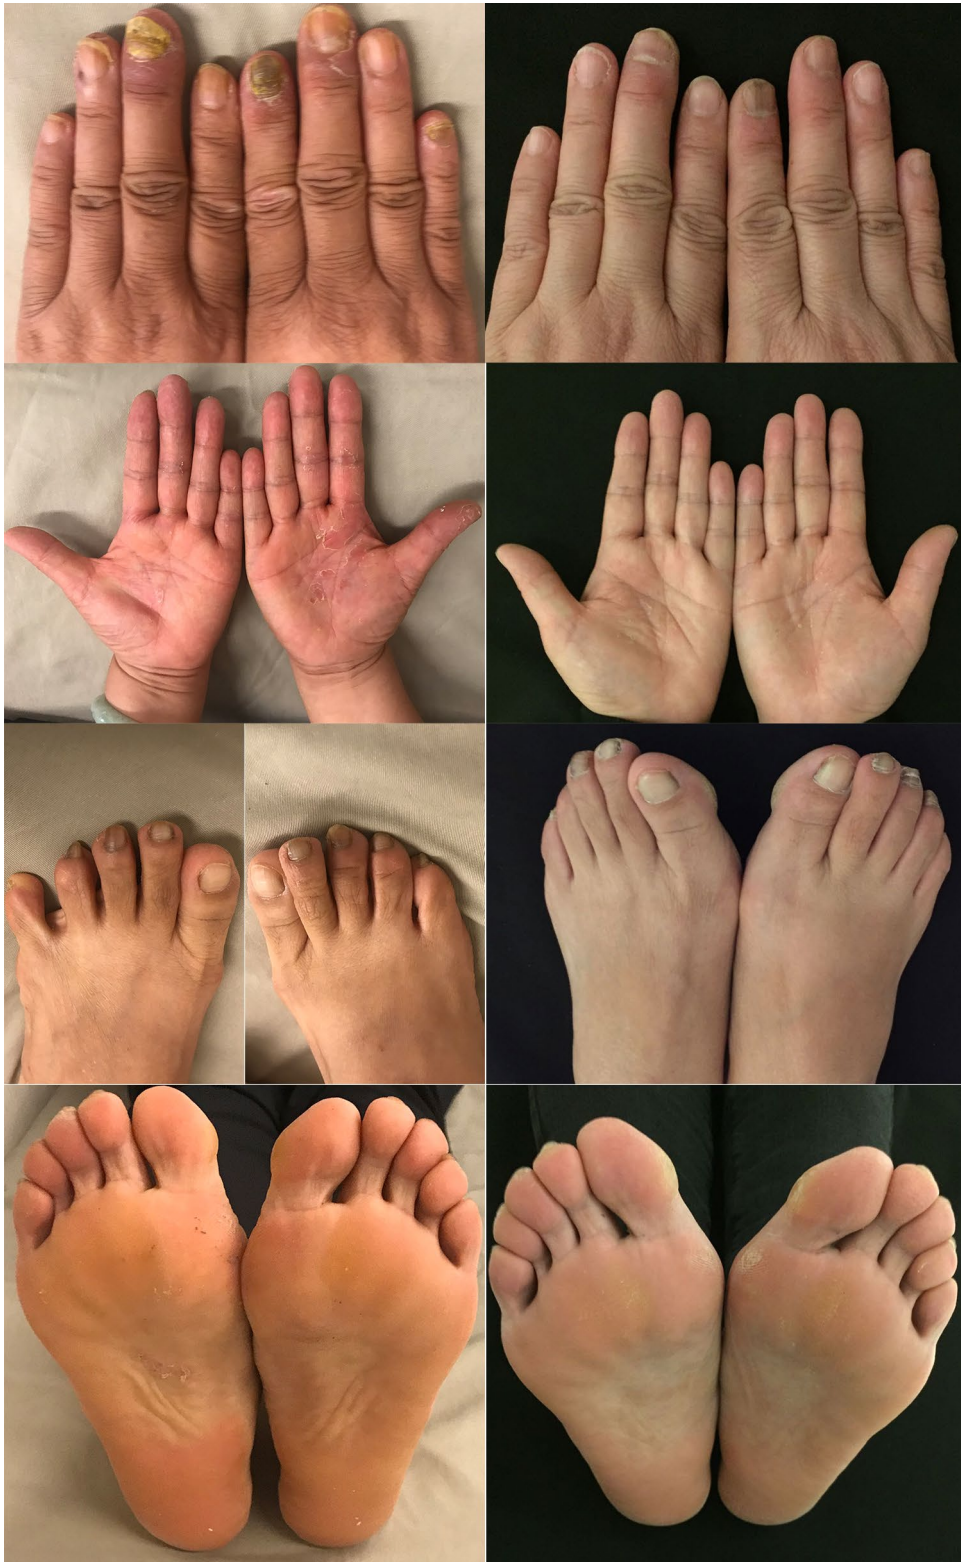

**eFigure 7.** Nail and Skin Lesions in Patients with SAPHO Syndrome Before (Left Column) and After (Right Column) Tofacitinib Treatment: Case 5.

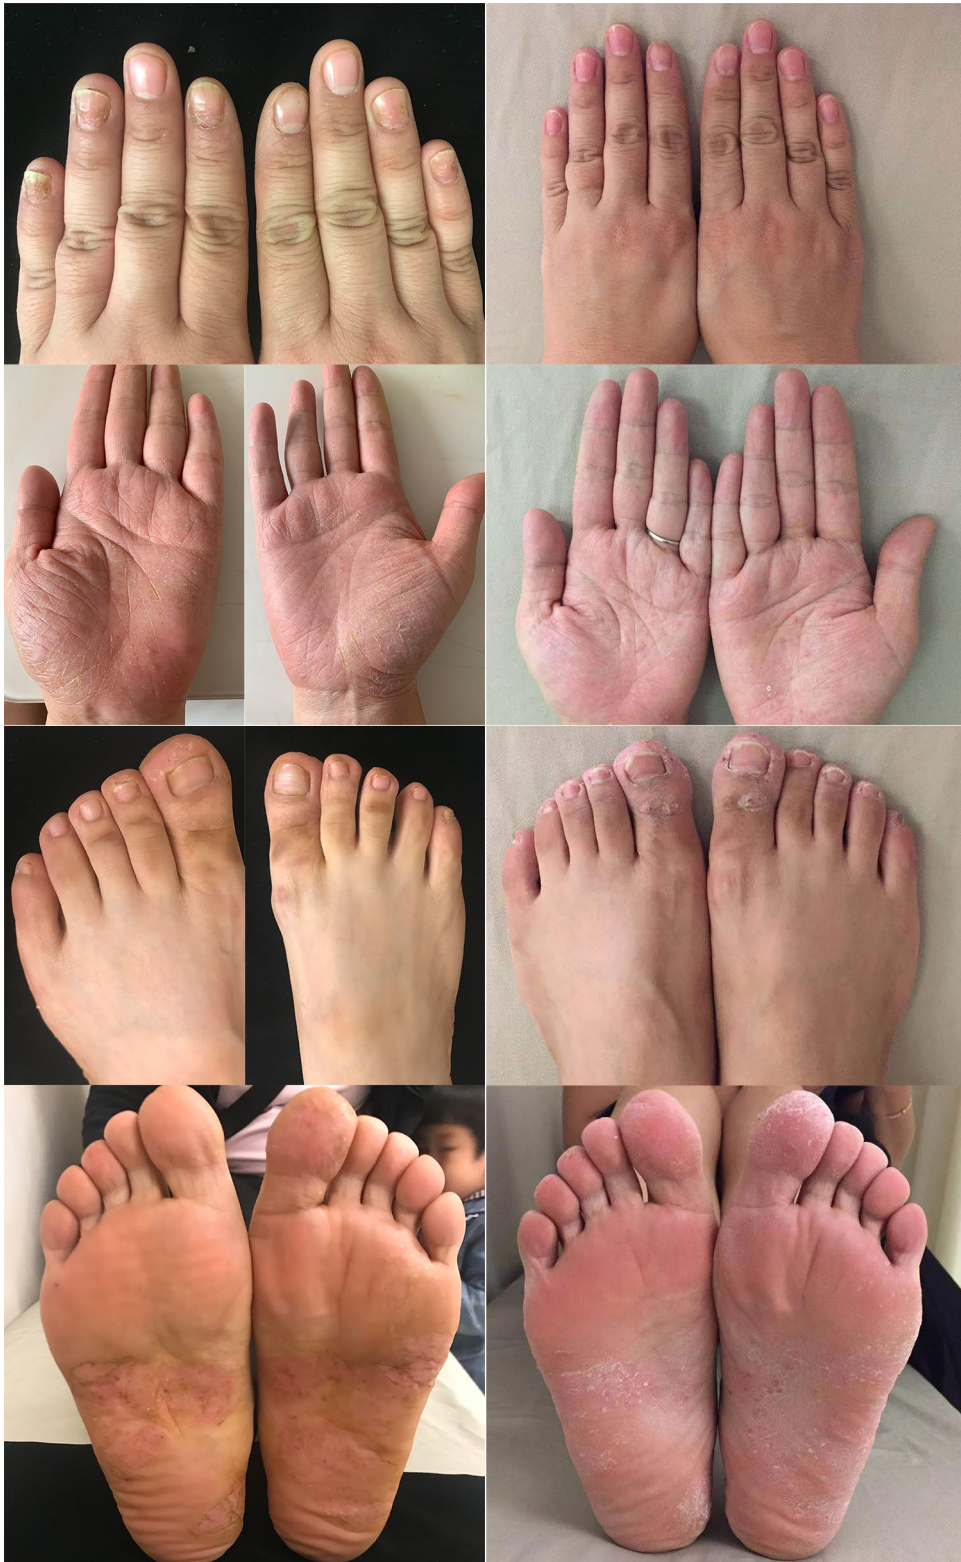



**eFigure 8.** Nail and Skin Lesions in Patients with SAPHO Syndrome Before (Left Column) and After (Right Column) Tofacitinib Treatment: Case 6.

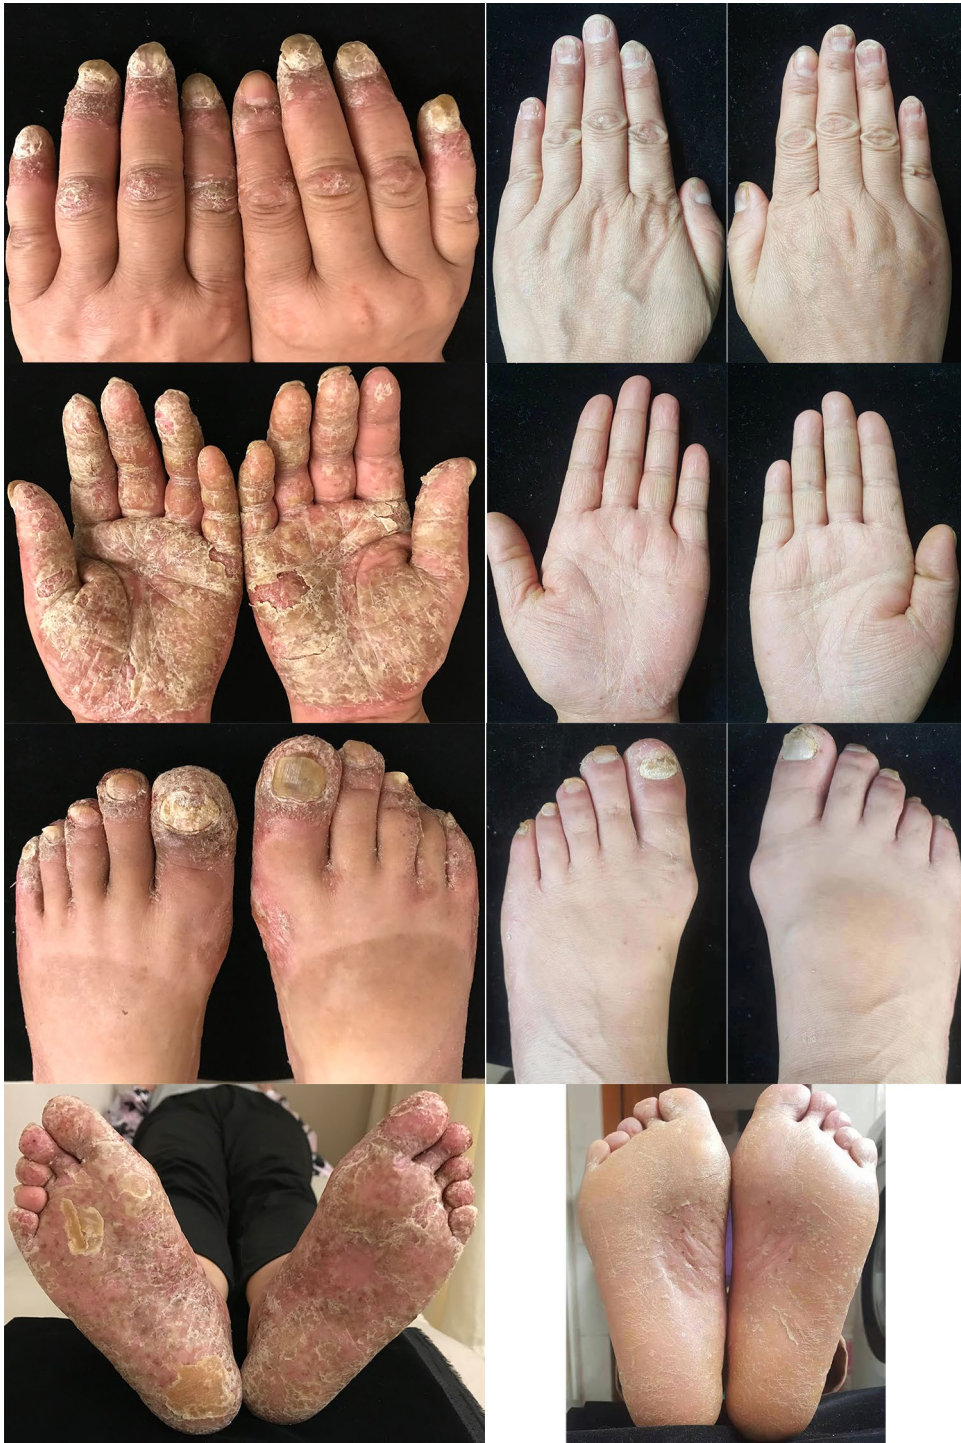

**eFigure 9.** Nail and Skin Lesions in Patients with SAPHO Syndrome Before (Left Column) and After (Right Column) Tofacitinib Treatment: Case 7.

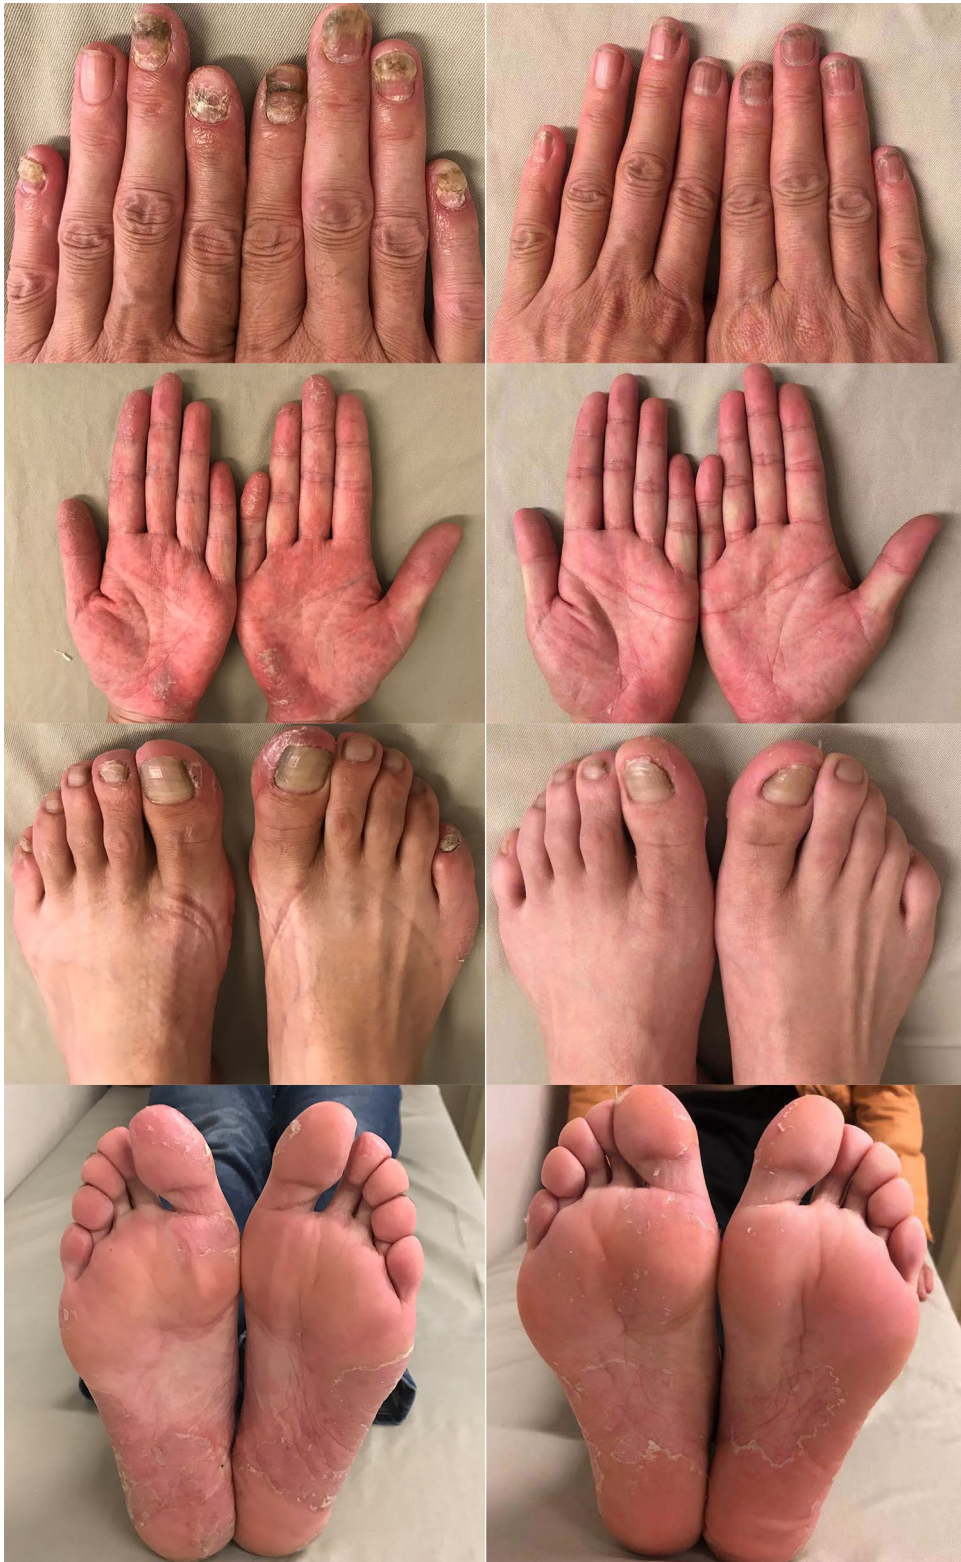



**eFigure 10.** Nail and Skin Lesions in Patients with SAPHO Syndrome Before (Left Column) and After (Right Column) Tofacitinib Treatment: Case 8.

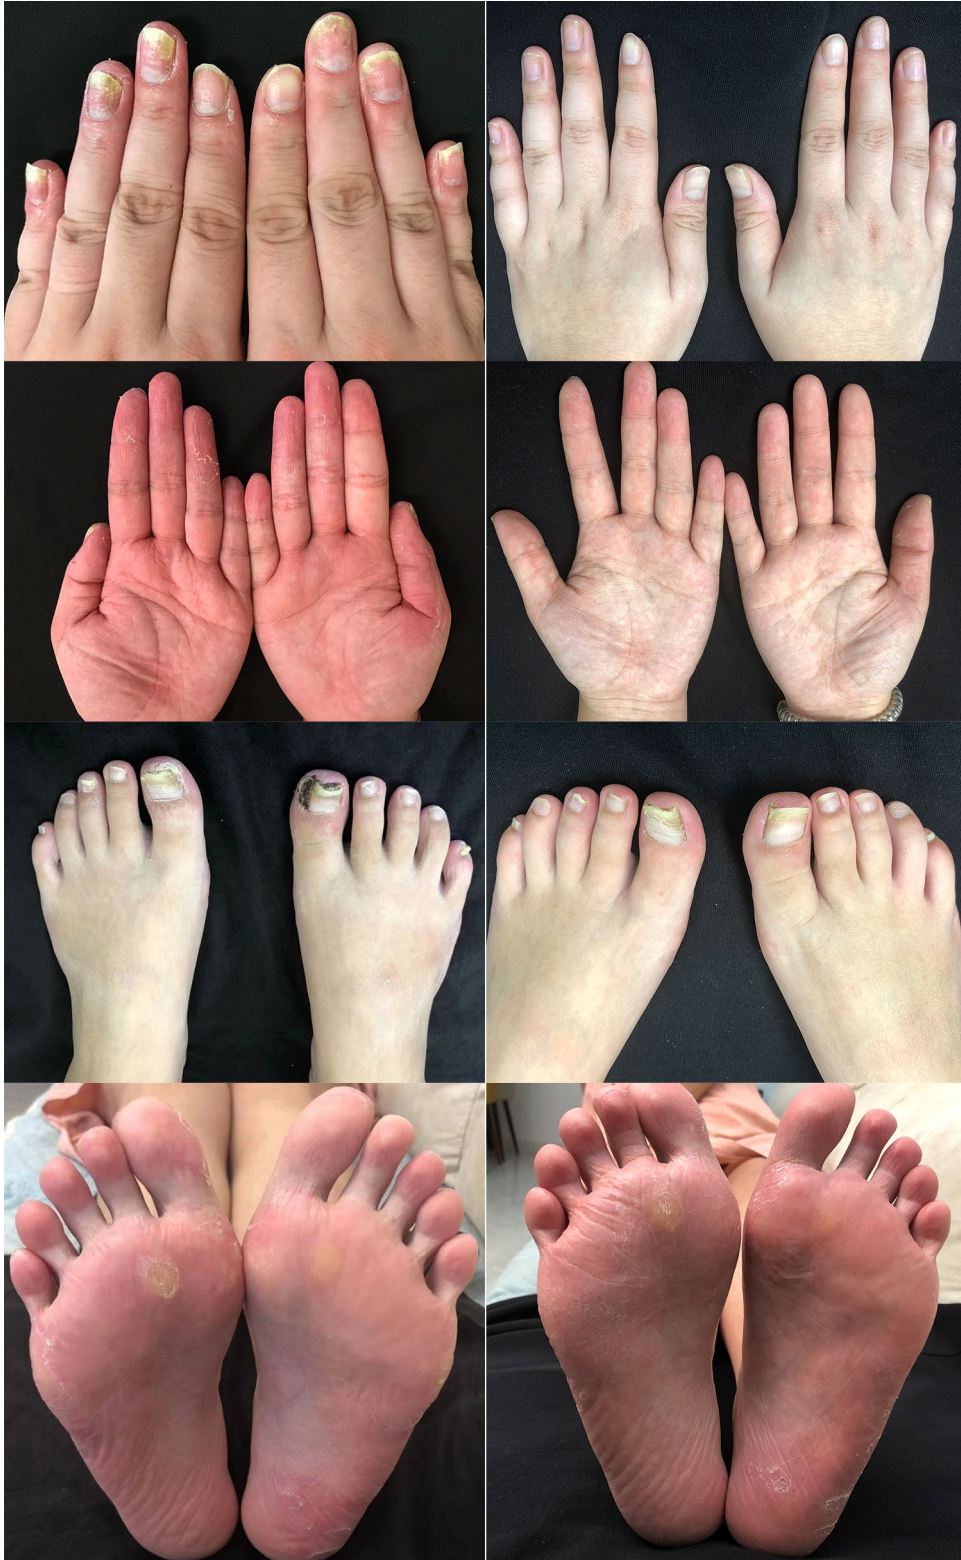



**eFigure 11.** Nail and Skin Lesions in Patients with SAPHO Syndrome Before (Left Column) and After (Right Column) Tofacitinib Treatment: Case 9.

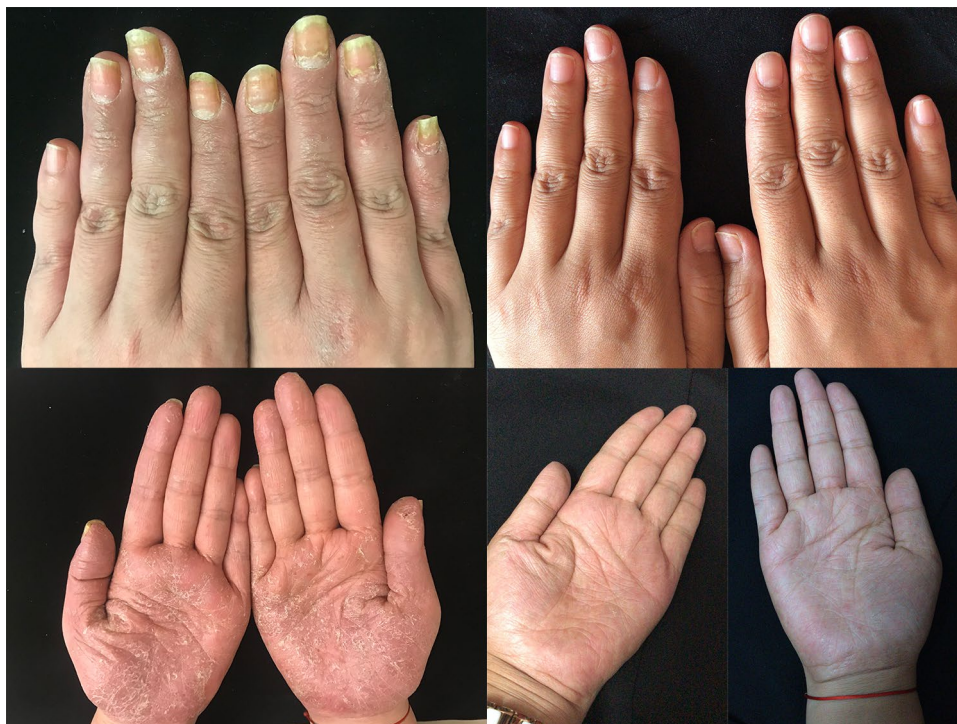

**eFigure 12.** Nail and Skin Lesions in Patients with SAPHO Syndrome Before (Left Column) and After (Right Column) Tofacitinib Treatment: Case 10.

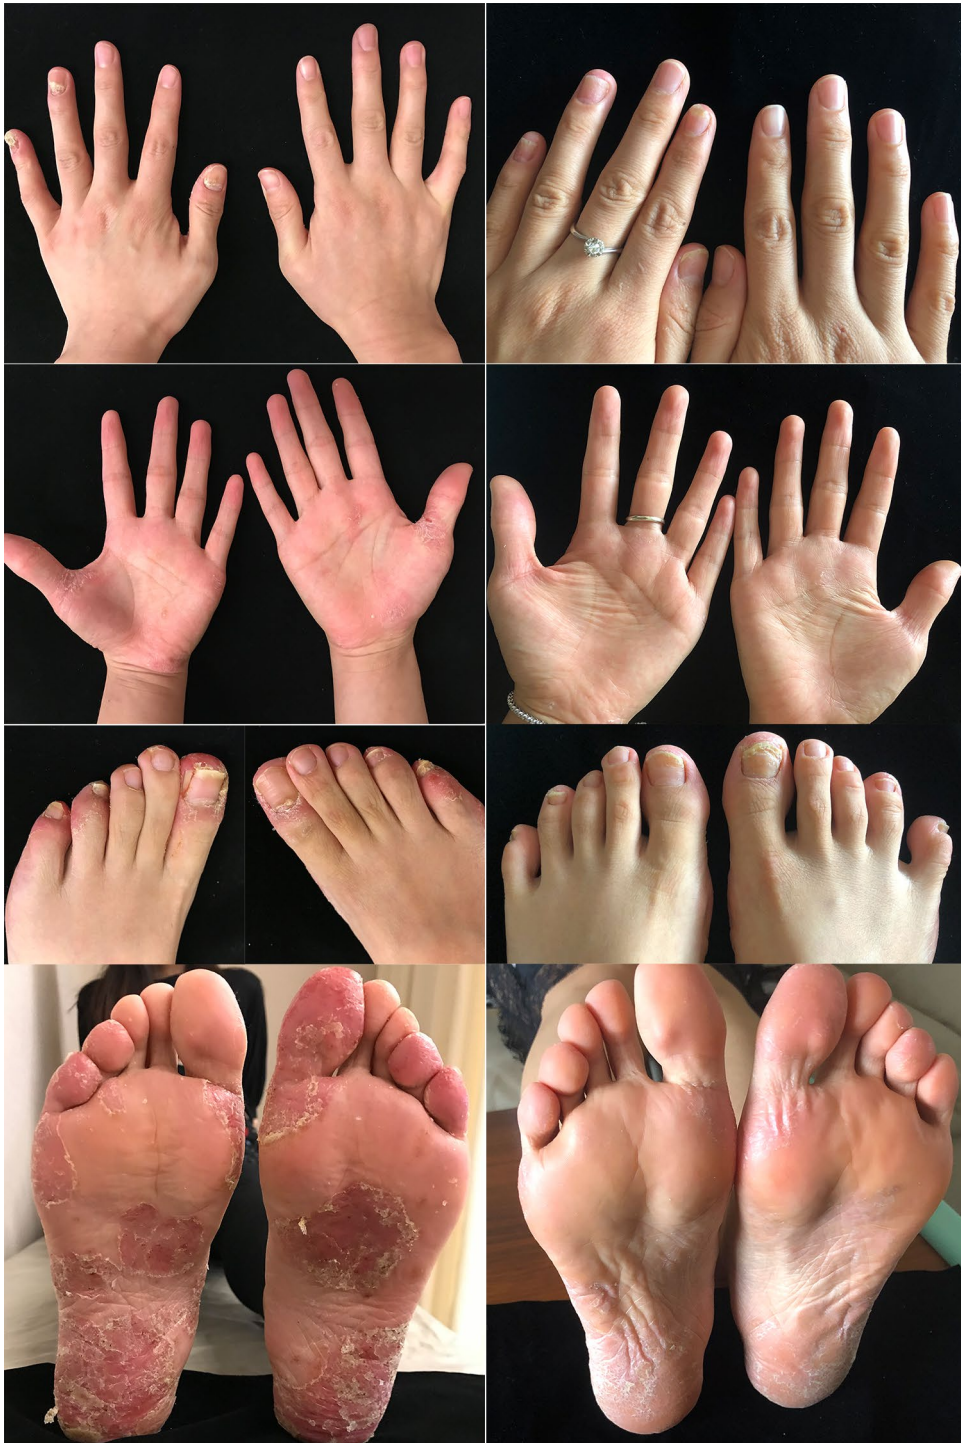



**eFigure 13.** Nail and Skin Lesions in Patients with SAPHO Syndrome Before (Left Column) and After (Right Column) Tofacitinib Treatment: Case 11.

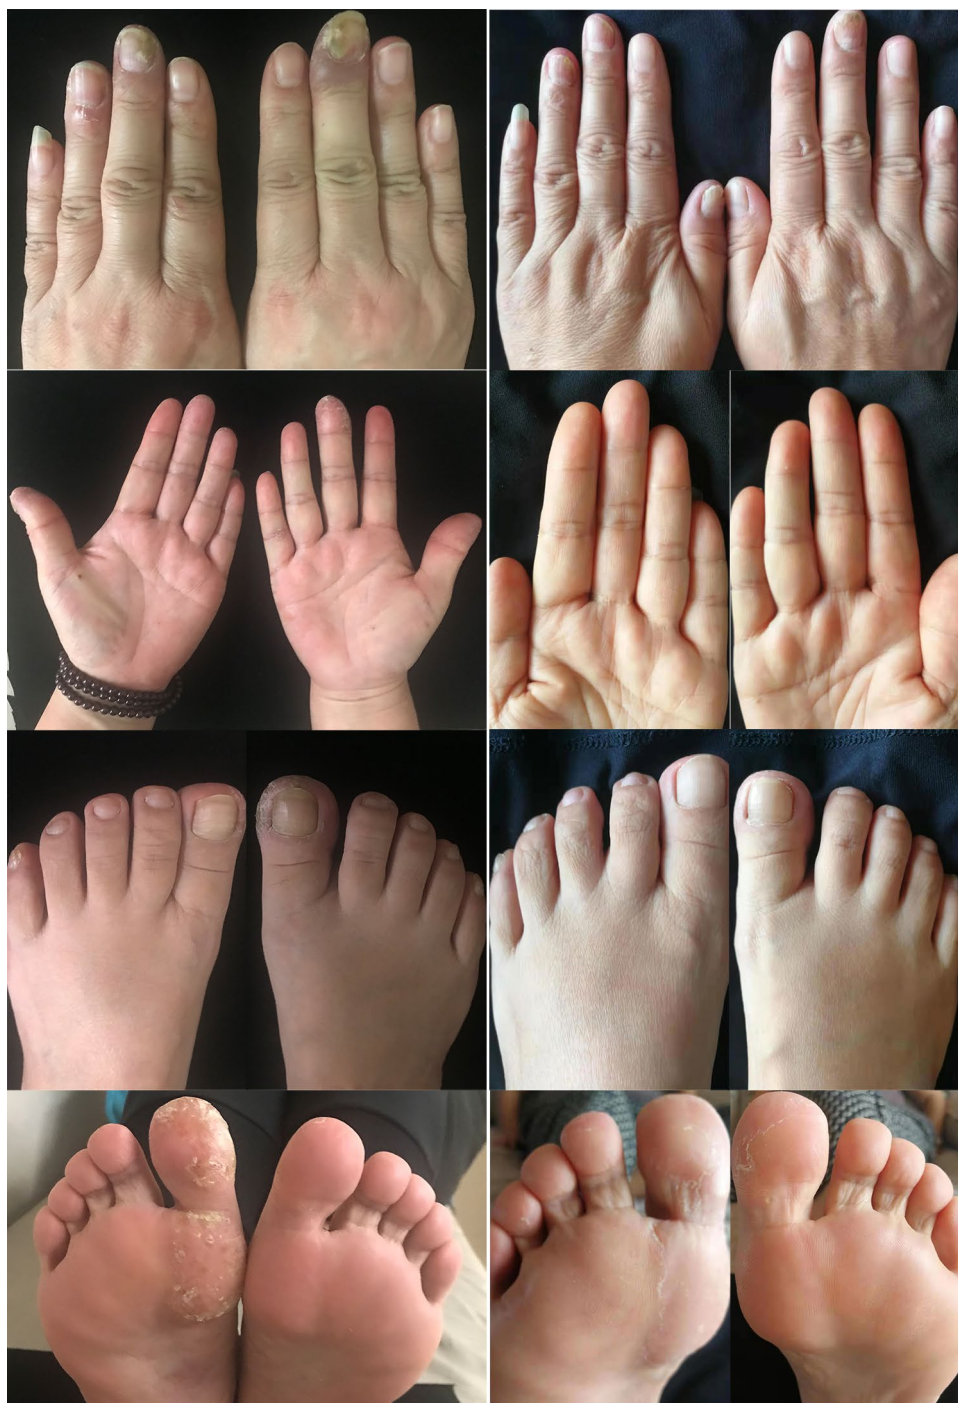



**eFigure 14.** Nail and Skin Lesions in Patients with SAPHO Syndrome Before (Left Column) and After (Right Column) Tofacitinib Treatment: Case 12.

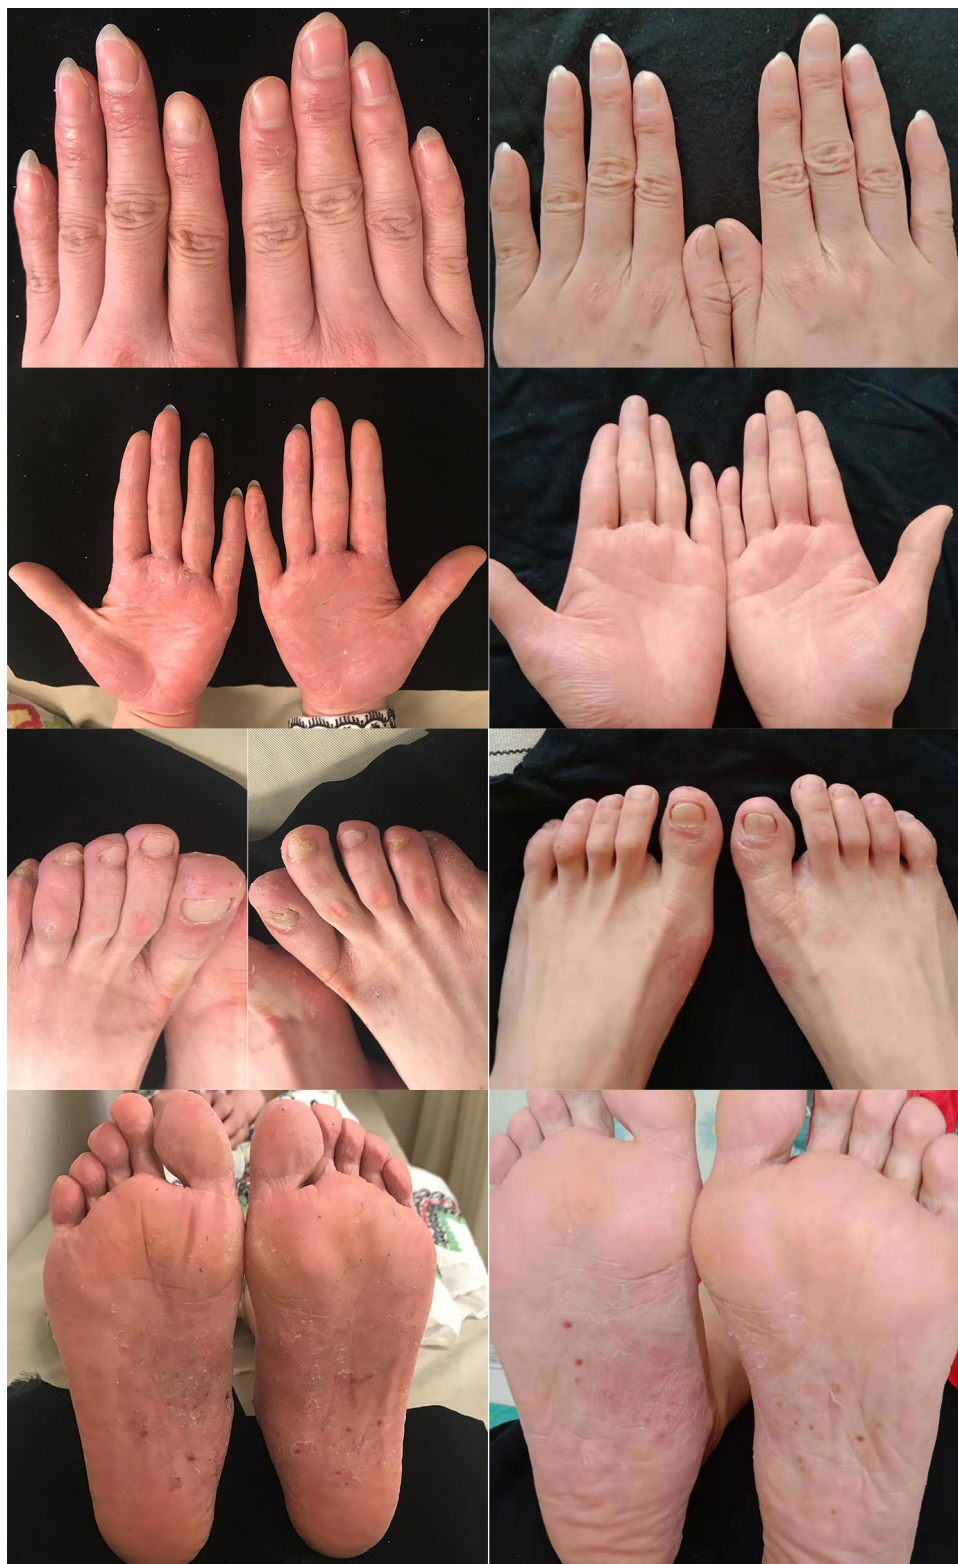

**eFigure 15.** Nail and Skin Lesions in Patients with SAPHO Syndrome Before (Left Column) and After (Right Column) Tofacitinib Treatment: Case 13.

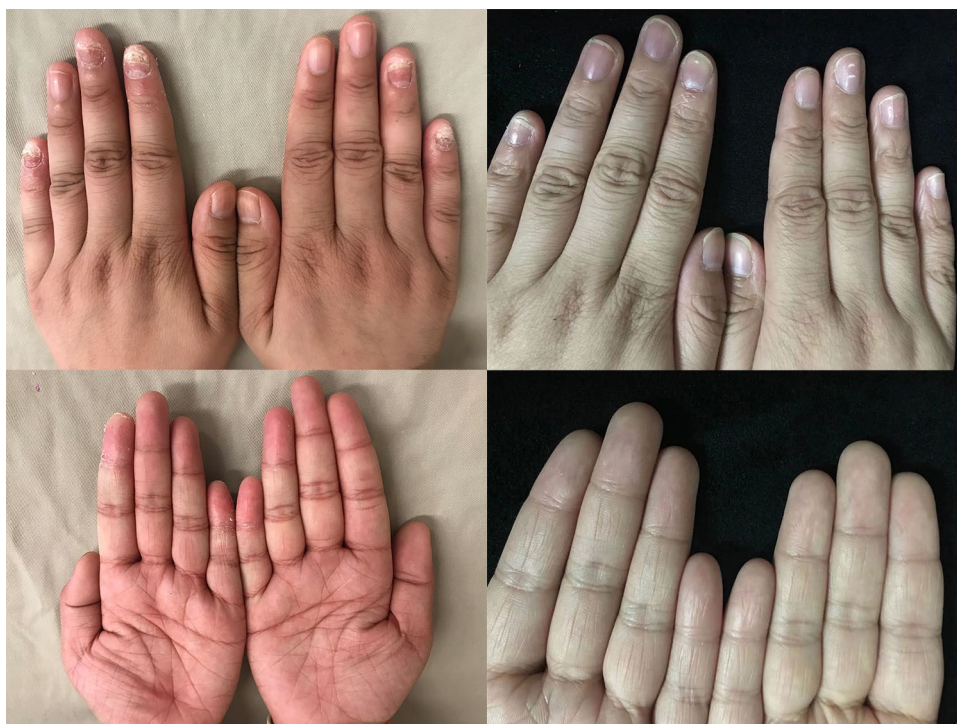

Supplement: jamadermatol-e203095-s001.pdf [file jamadermatol-e203095-s001.pdf]
